# Supplementary material
Source: HighWire-hosted journal article supplement (https://bmjopenquality.bmj.com/highwire/filestream/143638/field_highwire_adjunct_files/2/bmjoq-2021-001483supp003_data_supplement.pdf)

## 1. Revised Triage Policy- Flow Process

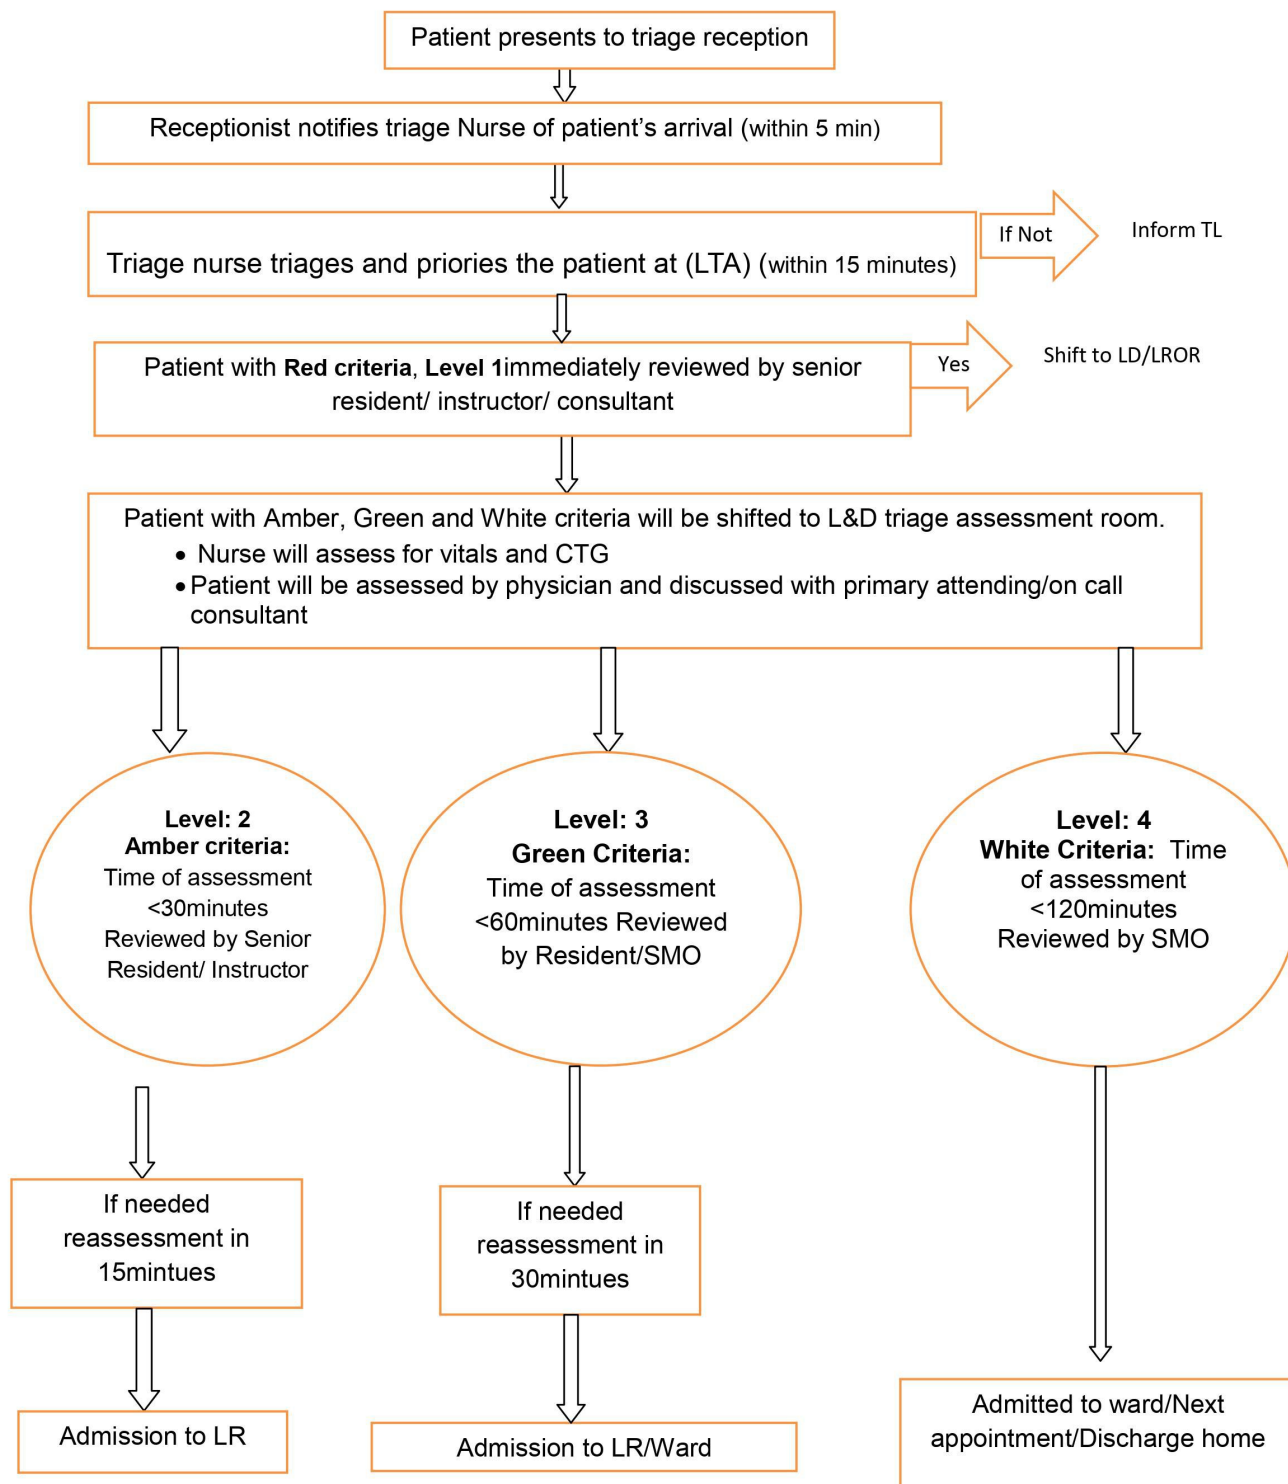

Supplement: bmjoq-2021-001483supp003_data_supplement.pdf [file bmjoq-2021-001483supp003_data_supplement.pdf]
